# Supplementary material for: Dementia and Traffic Accidents: A Danish Register-Based Cohort Study
Source: PubMed Central journal article supplement (PMC5059484; doi:10.2196/resprot.6466), 2016-09-27
Supplement: resprot_v5i3e191_app1.pdf [file resprot_v5i3e191_app1.pdf]

## Appendix A: ATC-codes for drugs in the Danish National Prescription Registry

| Diseases               | Prescription name                               | Drug                                                                                                                                                                                                                                                                           | ATC-codes                                                                                                                                                                                                     |
|------------------------|-------------------------------------------------|--------------------------------------------------------------------------------------------------------------------------------------------------------------------------------------------------------------------------------------------------------------------------------|---------------------------------------------------------------------------------------------------------------------------------------------------------------------------------------------------------------|
| Dementia               | Anticholinesterases                             | Tacrine, Donepezile, Rivastigmine, Galantamine                                                                                                                                                                                                                                 | N06DA01, N06DA02, N06DA03, N06DA04                                                                                                                                                                            |
|                        | Other anti-dementia drugs                       | Memantine                                                                                                                                                                                                                                                                      | N06DX1                                                                                                                                                                                                        |
| Type 2 diabetes        | Anti-diabetic                                   |                                                                                                                                                                                                                                                                                | A10B                                                                                                                                                                                                          |
| Depression             | SSRI (selective serotonin re-uptake inhibitors) | Fluoxetine, citalopram, paroxetine, sertraline, fluvoxamine, and escitalopram                                                                                                                                                                                                  | N06AB                                                                                                                                                                                                         |
|                        | MAOIs (monoamine oxidase inhibitors)            | Isocarboxazid, moclobemide                                                                                                                                                                                                                                                     | N06AF, N06AG                                                                                                                                                                                                  |
|                        | Other antidepressants                           | Mianserin, nefazodone, mirtazapine, venlafaxine, reboxetine, duloxetine, and agomelatine                                                                                                                                                                                       | N06AX                                                                                                                                                                                                         |
|                        | Tricyclic antidepressants (TCAs)                | Desipramine, imipramine, imipramine oxide, clomipramine, opipramol, trimipramine, Iofepramine, dibenzepin, amitriptyline, nortriptyline, protriptyline, doxepin, iprindole, melitracen, butriptyline, dosulepin, amoxapine, dimetacrine, amineptine, maprotiline, quinupramine | N06AA                                                                                                                                                                                                         |
| COPD                   |                                                 | Inhaled corticosteroids with long-acting beta2-agonists (ICS/LABA); Long-acting anti-cholinergics (LAMA); Long acting beta <sub>2</sub> -agonists (LABA)(51)                                                                                                                   | R03A (adrenergics for inhalation) R03B (other drugs for obstructive lung disease, inhalation)                                                                                                                 |
| Ischemic heart disease | Anti-IHD medicine(52)                           | Cardiac glycosides, Vasodilators, Antihypertensiva, Diuretics, Alpha-and beta-blockers, Calcium channel blockers, ACE-inhibitors and angiotensin-II antagonists, Lipid-modifying agents                                                                                        | C01A, C01D, C02, C03, C07, C08, C09, C10                                                                                                                                                                      |
| Hypertension           | Anti-hypertensive medicines(53)                 | α-antagonists, Diuretics, Beta-blockers, Calcium antagonists, ACE-inhibitors, and angiotensin II receptor antagonists                                                                                                                                                          | C02, C03, C07A, C08, C09                                                                                                                                                                                      |
| Stroke                 | Antiplatelet(54, 55)                            | Acetylsalicylic acid, Dipyridamole, Low-dose aspirin, dipyridamole, Clopidogrel                                                                                                                                                                                                | B01AC06, N02BA01, B01AC07, B01AC30, B01AC04                                                                                                                                                                   |
| Atrial fibrillation    | Anti-arrhythmic medication(56)                  | Vitamin K antagonists, Aspirin; β-blockers; Non-dihydropyridine calcium-channel blockers, Amiodarone, and Digoxin                                                                                                                                                              | B01AA03, B01AA04, B01AC06, C08                                                                                                                                                                                |
| Asthma                 | Anti-asthmatic medication(57)                   | SABAs; Anticholinergics<br>Glucocorticosteroids; LABAs; Fixed                                                                                                                                                                                                                  | R03AC02, R03AC03, R03AC04, R03AC12, R03CC03, R03CC02, R03BB01, R03BA01, R03BA02, R03BA05, R03BA07, R03BA12, R03BA13, R03AC12, R03AC13, R03DC03, R03DC04, R03CC12, R03BB04, R03AK03, R03AK04, R03AK06, R03AK07 |
