# Supplementary material for: Dementia and Traffic Accidents: A Danish Register-Based Cohort Study
Source: PubMed Central journal article supplement (PMC5059484; doi:10.2196/resprot.6466), 2016-09-27
Supplement: resprot_v5i3e191_app2.pdf [file resprot_v5i3e191_app2.pdf]

## Appendix B. Overview of databases and indicators for data assessment

| Type of data           | Available databases                                                                                                                      | Indicators                                                                          |
|------------------------|------------------------------------------------------------------------------------------------------------------------------------------|-------------------------------------------------------------------------------------|
| Personal information   | The Danish Civil Registration System                                                                                                     | Age, sex, marital status, vital status, geographic location, emigration.            |
| Dementia               | The Danish National Patient Register;<br>The Danish Psychiatric Central Research Register;<br>The Danish National Prescription Registry. | Date of diagnosis,<br>Prescriptions of anti-dementia drugs.                         |
| Type 2 diabetes        | The Danish National Patient Register;<br>The Danish National Diabetes Register;<br>The Danish National Prescription Registry.            | Date of diagnosis,<br>Prescriptions of anti-diabetic drugs                          |
| Ischemic heart disease | The Danish National Patient Register;<br>The Danish National Heart Register;<br>The Danish National Prescription Registry.               | Date of diagnosis,<br>Prescription of heart-related drugs                           |
| COPD                   | The Danish National Patient Register;<br>The Danish National Prescription Registry.                                                      | Date of diagnosis,<br>Prescription of anti-COPD drugs                               |
| Depression             | The Danish National Patient Register;<br>The Danish National Prescription Registry.                                                      | Date of diagnosis,<br>Prescription of anti-depressive drugs                         |
| Medications            | Danish National Prescription Registry                                                                                                    | Date of prescriptions of medicine                                                   |
| Traffic accident       | Statistics of Denmark;<br>The Danish National Patient Register;                                                                          | Date of accident, location, type of accident.<br>Date of diagnosis and hospitalized |
| Driving license        | Denmark Police Office                                                                                                                    | Date of issued, date of license cession.                                            |
| Other variables        | Statistics of Denmark                                                                                                                    | Education level; status of living in a nursing home                                 |
