# Supplementary material for: Dementia and Traffic Accidents: A Danish Register-Based Cohort Study
Source: PubMed Central journal article supplement (PMC5059484; doi:10.2196/resprot.6466), 2016-09-27
Supplement: resprot_v5i3e191_app3.pdf [file resprot_v5i3e191_app3.pdf]

## Appendix C: Medicines labelled with side-effects as impaired driving ability

| Diseases                                                  |                                                  |                                                                                                |                                                                           |                                                                                                                                       |
|-----------------------------------------------------------|--------------------------------------------------|------------------------------------------------------------------------------------------------|---------------------------------------------------------------------------|---------------------------------------------------------------------------------------------------------------------------------------|
| <b>Digestive system</b><br>(Fordøjelsessystemet)          | Peristaltikfremmende (A03FA)                     | Metoclopramid                                                                                  | A03FA01                                                                   | Primperan, Emperal, Gatro-Timelets, Akineton, Lysantin, Kemadrin                                                                      |
|                                                           | Antikolinergikum med kvartært nitrogenatom (A03) | Hyoscinbutylbromid, Propanthelinbromid                                                         | A03BB01, A03AB05                                                          | Buscopan<br>Ercoril                                                                                                                   |
| <b>Ulcer Medicine</b><br>(Mavesårsmedicin)                | H2-receptor-antagonister (A02BA)                 | Ranitidin                                                                                      | A02BA02                                                                   | Acikure                                                                                                                               |
| <b>Heart</b> (Hjerte-Kar)                                 | Glykosider (C01AA)                               | Digoxin                                                                                        | C01AA05                                                                   | Digoxin                                                                                                                               |
|                                                           | Beta-blokker (C07A)                              |                                                                                                |                                                                           |                                                                                                                                       |
|                                                           | Non-selektive (C077A)                            | Propranolol                                                                                    | C07AA05                                                                   | Propol, Propranolol, Propranolol Retard.                                                                                              |
|                                                           |                                                  | Pinidol<br>Sotalol                                                                             | C07AA03<br>C07AA07                                                        | Hexapindol, Visken.<br>Sotalol.                                                                                                       |
|                                                           | Beta1-selektive (C07AB)                          | Atenolol                                                                                       | C07AB03                                                                   | Atenodan, Atenolol, Tenormin, Uniloc.                                                                                                 |
|                                                           |                                                  | Bisoprolol<br>fumarat                                                                          |                                                                           | Bisoprolol, Cardicor, Emconcor.                                                                                                       |
|                                                           |                                                  | Esmolol                                                                                        | C07AB09                                                                   | Brevibloc                                                                                                                             |
|                                                           |                                                  | Metoprolol                                                                                     | C07AB02                                                                   | Mepronet, Metocar, Metomylan, Metoprolol.                                                                                             |
|                                                           | Beta-blokkere med alfa-blokerende effekt (C07B)  | Nebivolol                                                                                      | C07AB12                                                                   | Hypoloc, Lobivon, Nebivolol.                                                                                                          |
| Atenolol, Chlortalidon                                    |                                                  | C07CB03                                                                                        | Tenidon, Tenoretic.                                                       |                                                                                                                                       |
| Hydrochlorthiazid, Nebivolol                              |                                                  | C07BB12                                                                                        | Hypoloc                                                                   |                                                                                                                                       |
|                                                           | Hydrochlorthiazid, Metoprolol                    | C07BB                                                                                          | Zok-Zid                                                                   |                                                                                                                                       |
| <b>Drugs for incontinence</b><br>(Midler mod inkontinens) | Antikolinergika (G04BD)                          | Tolterodin                                                                                     | G04BD07                                                                   | Detrusitol Retard, Tolterodin, Tolterodine, Tolterodintartrat.                                                                        |
|                                                           |                                                  | Solifenacin                                                                                    | G04BD08                                                                   | Vesicare                                                                                                                              |
|                                                           |                                                  | Solifenacin, Tamsulosin                                                                        | G04CA53                                                                   | Urizia, komb.                                                                                                                         |
|                                                           |                                                  | Fesoterodin                                                                                    | G04BD11                                                                   | Toviaz                                                                                                                                |
| <b>Analgesics</b><br>(Analgetika)                         | Opioider, kombinationer (N02AA)                  | Dimethylaminodiphenylbuten, Ketobemidon                                                        | N02AG02                                                                   | Ketogan                                                                                                                               |
|                                                           | Rene opioidagonister                             | Oxycodon<br>Morphin                                                                            | N02AA05<br>N02AA01                                                        | Oxycontin<br>Morfin                                                                                                                   |
|                                                           | NSAID (M01A)                                     |                                                                                                |                                                                           |                                                                                                                                       |
|                                                           | ASA (N02BA)                                      |                                                                                                |                                                                           |                                                                                                                                       |
|                                                           | COX-hæmmere (B01AC)                              |                                                                                                |                                                                           |                                                                                                                                       |
| <b>Sleep/Anxiety</b><br>(Søvn/Angst)                      | Quinin (P01BC01)                                 |                                                                                                |                                                                           |                                                                                                                                       |
| <b>Hypnotica</b><br>(Hypnotica)                           | Sederende antihistaminer (R06A)                  | Promethazin                                                                                    | R06AD02                                                                   | Phenergan, Prometazin                                                                                                                 |
|                                                           | Benzodiazepiner (hypnotica) (N05CD)              | Lormetazepam                                                                                   | N05CD06                                                                   | Pronoctan                                                                                                                             |
|                                                           |                                                  | Midazolam<br>Nitrazepam<br>Triazolam                                                           | N05CD08<br>N05CD02<br>N05CD05                                             | Midazolam<br>Nitrazepam, Pacisyn<br>Halcion                                                                                           |
| Benzodiazepinlignende midler, Cyclopyrroloner (N05CF)     | Zopiclon                                         | N05CF01                                                                                        | Imovane, Sonata, Zonoct<br>Imozop, Zopiclone                              |                                                                                                                                       |
| <b>Anxiolytics</b><br>(Anxiolytica)                       | Imidazopyridiner                                 | Zolpidem                                                                                       | N05CF02                                                                   | Stilnoct, Zolpidem, Zonoct, Imoclone                                                                                                  |
|                                                           | Pyrazolopyrimidiner                              | Zaleplon                                                                                       | N05CF03                                                                   | Sonata                                                                                                                                |
|                                                           | Benzodiazepiner (Anxiolytica) (N05BA)            | Alprazolam                                                                                     | N05BA01                                                                   | Alprazolam, Alprox, Tafil                                                                                                             |
|                                                           |                                                  | Bromazepam                                                                                     | N05BA08                                                                   | Bromam, Lexotan                                                                                                                       |
|                                                           |                                                  | Diazepam                                                                                       |                                                                           | Stesolid, Apozepam, Hexalid, Diazepam                                                                                                 |
|                                                           |                                                  | Chlordiazepoxid                                                                                | N05A02                                                                    | Kopoxid, Risolid                                                                                                                      |
| Clobazam                                                  |                                                  | N05BA09                                                                                        | Frisium                                                                   |                                                                                                                                       |
| Lorazepam                                                 | N05BA06                                          | Lorazepam, Orfidal, Temesta                                                                    |                                                                           |                                                                                                                                       |
| Oxazepam                                                  | N05BA04                                          | Alopam, Oxabenz, Oxapax, Oxazepam                                                              |                                                                           |                                                                                                                                       |
| <b>Psychiatric drugs</b><br>(Psykofarmaka)                | Buspiron (Azapirongruppen) (N05BE)               | Busporion                                                                                      | N05BE01                                                                   | Busporion, Busporione                                                                                                                 |
|                                                           | Tricykliske antidepressive (N06AA)               | Amitriptylin<br>Clomipramin<br>Dosulepin<br>Doxipen<br>Imipramin<br>Maprotilin<br>Nortriptylin | N06AA09<br>N06AA04<br>N06AA16<br>N06AA12<br>N06AA02<br>N06AA21<br>N06AA10 | Amytriptylin, Saroten<br>Anafranil, Clomipraminhydrochlorid, Klomipramin<br>Prothiaden<br>Siquan<br>Imipramin<br>Ludiomil<br>Noritren |

|                                                         |                                           |                                                                                                                                                           |                                                                                                            |                                                                                                                                                                                                                                                                                     |
|---------------------------------------------------------|-------------------------------------------|-----------------------------------------------------------------------------------------------------------------------------------------------------------|------------------------------------------------------------------------------------------------------------|-------------------------------------------------------------------------------------------------------------------------------------------------------------------------------------------------------------------------------------------------------------------------------------|
|                                                         | Antipsykotika (N05A)                      | <b>1.generations. Lavdosis</b><br>Flupentixol<br>Haloperidol<br>Pimozid                                                                                   | N05AF01<br>N05AD01<br>N05AG02                                                                              | Fluxanol<br>Serenase<br>Orap                                                                                                                                                                                                                                                        |
|                                                         |                                           | <b>1.generations. Middeldosis</b><br>Periciazin<br>Prochlorperazin<br>Zuclophentixol<br>Zuclophentixoacetat                                               | N05AC01<br>N05AB04<br>N05AF05<br>N05AF05                                                                   | Neulactil<br>Stemtil<br>Cisordinol, Clopixol<br>Cisordinalacutard, Zuclophentixoacetat                                                                                                                                                                                              |
|                                                         |                                           | <b>1.generations. Højddosis</b><br>Chlorprothixen<br>Levomepromazin<br>Melperon<br>Pipamperon<br>Sulpirid                                                 | N05AF03<br>N05AA02<br>N05AD03<br>N05AD05<br>N05AL01                                                        | Truxal<br>Nozinan<br>Buronil<br>Dipiperon<br>Dogmatil                                                                                                                                                                                                                               |
|                                                         |                                           | <b>2.generations</b><br>Amisulprid<br>Aripipazol<br>Asenapin<br>Clozapin<br>Olanzapin<br>Paliperidon<br>Quetiapin<br>Risperdon<br>Sertindol<br>Ziprasidon | N05AL05<br>N05AX12<br>N05AH05<br>N05AH02<br>N05AH02<br>N05AX13<br>N05AH04<br>N05AX08<br>N05AE03<br>N05AE04 | Amisulprid, Solian.<br>Abilify<br>Sycrest<br>Clozapin, Clozapine, Leponex.<br>Olanzapin, Olanzapine, Zalasta, Zyprexa<br>Invega<br>Alzen, Quetiapin, Quetiapine, Seroquel, Stadaquel.<br>Risperanne, Risperdal, Risperidon.<br>Serdolect<br>Geodon, Zeldox, Ziprasidon, Ziprazidone |
| <b>Anti-Parkinson agents</b><br>(Antiparkinson smidler) | Dopaminagonister (N04)                    | <b>Ergot dopaminagonister</b><br>Bromocriptin<br>Cabergolin                                                                                               | <b>N04BC</b><br>N04BC01<br>N04BC06                                                                         | Parlodel<br>Cabaser                                                                                                                                                                                                                                                                 |
|                                                         |                                           | <b>Non-ergot dopaminagonister</b><br>Apomorfin<br>Pramipexol<br>Ropinirol<br>Rotigotin                                                                    | N04BC07<br>N04BC05<br>N04BC04<br>N04BC09                                                                   | APO-go, Apomorphin<br>Derinik, Mirapexin, Opryme, Pramipexol, Pramipexole, Sifrol<br>Adatrel, ReQuip, Ropinirol<br>Neupro                                                                                                                                                           |
| <b>Epilepsy Medications</b><br>(Epilepsimedicin)        | Antikolinergika (N04A)                    | Biperiden<br>Orphenadrin<br>Procyclidin                                                                                                                   | N04AA02<br>N04AB02<br>N04AA04                                                                              | Akinetom<br>Lysantin<br>Kemadrin                                                                                                                                                                                                                                                    |
|                                                         | Barbitursyrederivater (N03AA)             | Phenobarbital<br>Primidon                                                                                                                                 | N03AA02<br>N03AA03                                                                                         | Fenemal<br>Primidon                                                                                                                                                                                                                                                                 |
|                                                         | Benzodiazepiner (epilepsi) (N03AE, N05BA) | Clobazam<br>Clonazepam<br>Diazepam<br>Midazolam                                                                                                           | N05AB09<br>N03AE01<br>N05BA01<br>N05CD08                                                                   | Frisium<br>Rivotril<br>Stesolid<br>Buccolam                                                                                                                                                                                                                                         |
|                                                         | Oxcarbazepin (N03AF)                      | Carbamazepin<br>Oxcarbazepin<br>Eslicarbazepin<br>Rufinamid                                                                                               | N03AF01<br>N03AF02<br>N03AF04<br>N03AF03                                                                   | Karbamazepin, Tegretal Retard, Tegretol, Trimonil<br>Apydan, Oxcarbazepin, Trileptal<br>Zebinix<br>Inovelon                                                                                                                                                                         |
|                                                         | Gabapentin (N03AX)                        | Gabapentin<br>Lacosamid<br>Lamotrigin<br>Levetiracetam<br>Perampanel<br>Pregabalin<br>Stiripentol<br>Retigabin<br>Topiramet<br>Zonisamid                  | N03AX12<br>N03AX18<br>N03AX09<br>N03AX14<br>N03AX22<br>N03AX16<br>N03AX17<br>N03AX21<br>N03AX11<br>N03AX15 | Gabapentin, Neurontin.<br>Vimpat<br>Lamictal, Lamotrigin.<br>Levetiracetam, Keppra<br>Fycompa<br>Lyrica<br>Diacomit<br>Trobal<br>Topimax, Topiramet<br>Zonegran                                                                                                                     |
|                                                         | Phenytoin og fosphenytoin (N03AD)         | Ethosuximid                                                                                                                                               | N03AD01                                                                                                    | Zarondan                                                                                                                                                                                                                                                                            |
|                                                         | N03AG                                     | Valproat<br>Vigabatin                                                                                                                                     | N03AG01<br>N03AG04                                                                                         | Delepsine, Orfiril.<br>Sabrilix                                                                                                                                                                                                                                                     |
|                                                         | Carbonanhydrasehæmmere (S01EC)            | Acetazolamid                                                                                                                                              |                                                                                                            |                                                                                                                                                                                                                                                                                     |
